# Supplementary material
Source: MDPI journal article supplement (https://www.mdpi.com/2673-9984/2/1/42)
Supplement: s1 [file s1]

# **Compact Objects in Brans-Dick Gravity**

**Speaker: Amal Majid**

**Supervisor: Prof. Dr. Muhammad Sharif**

**University of the Punjab**

**1st International Electronic Conference on Universe**

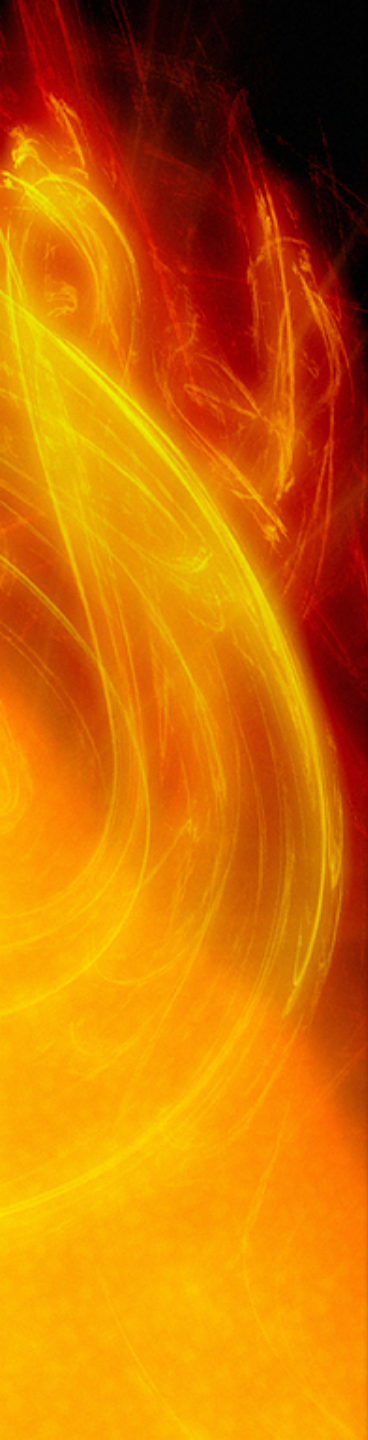

# Stellar Evolution

# From Beginning till End

BIRTH

MAIN SEQUENCE

OLD AGE

DEATH

REMNANTS

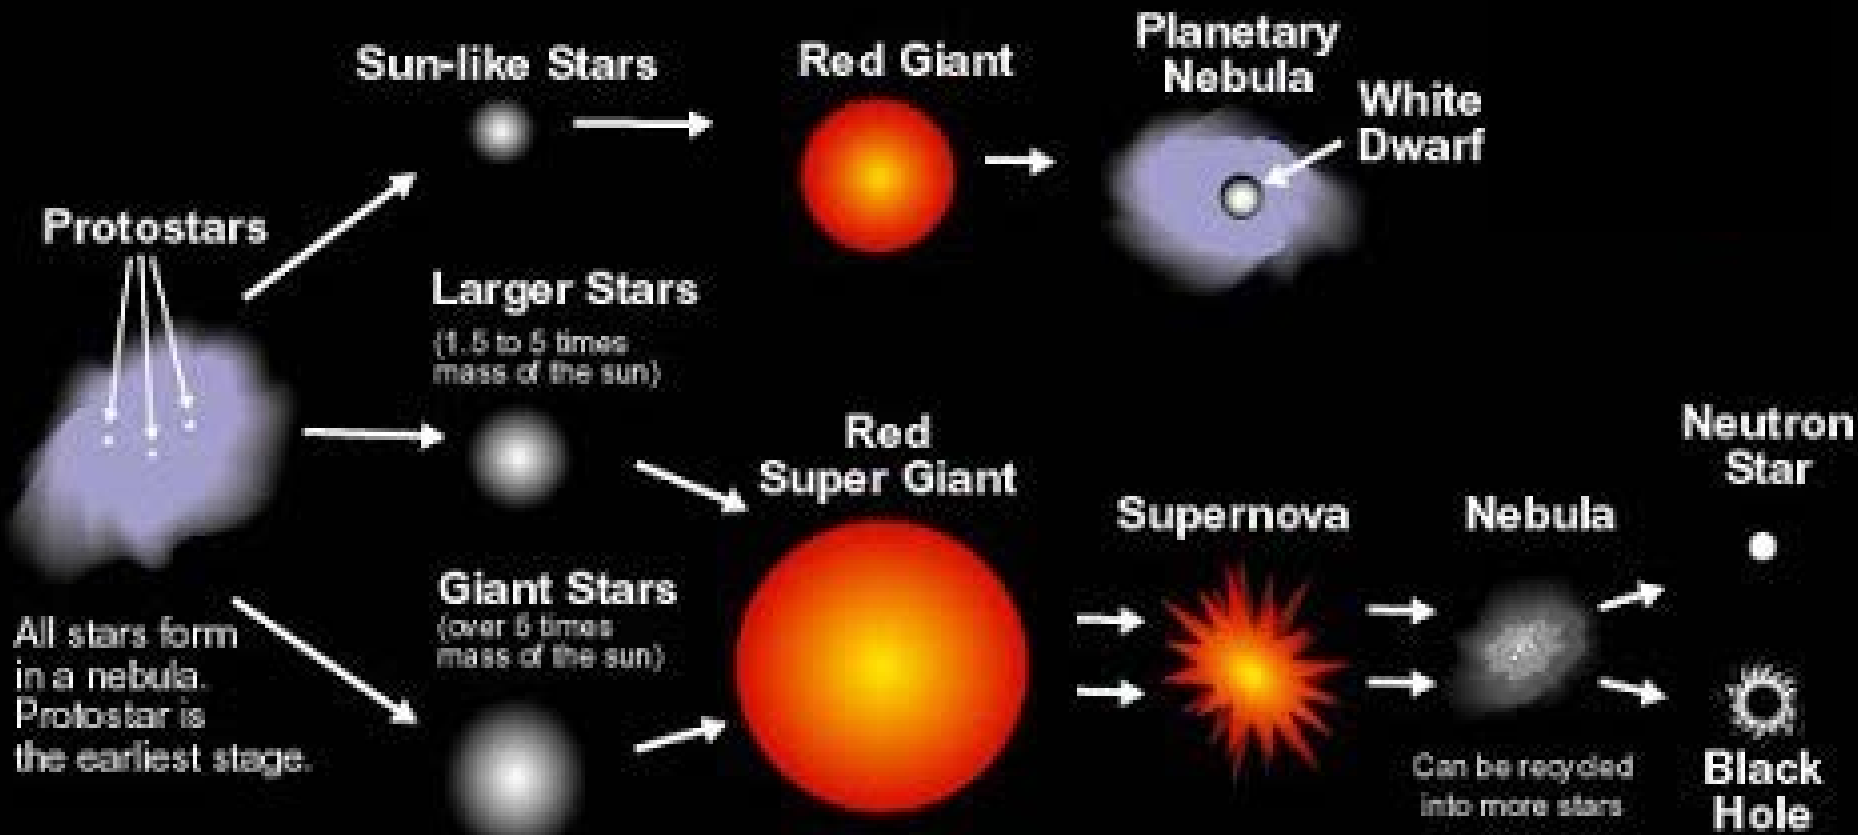



# Compact Objects

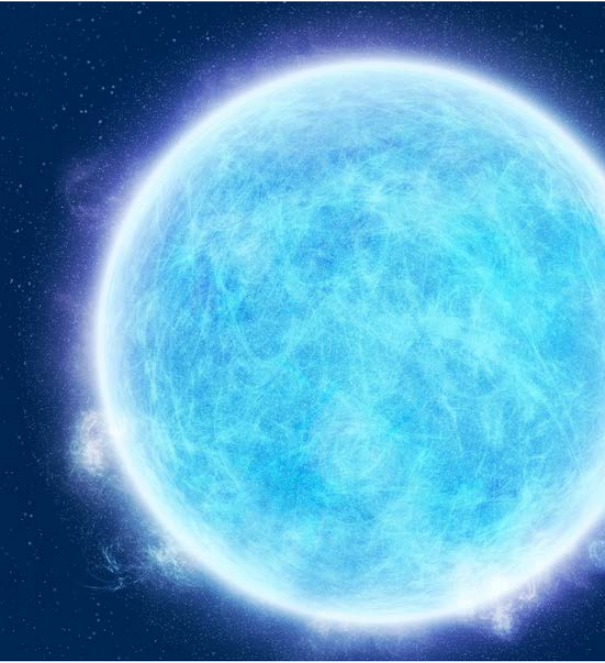

White Dwarf

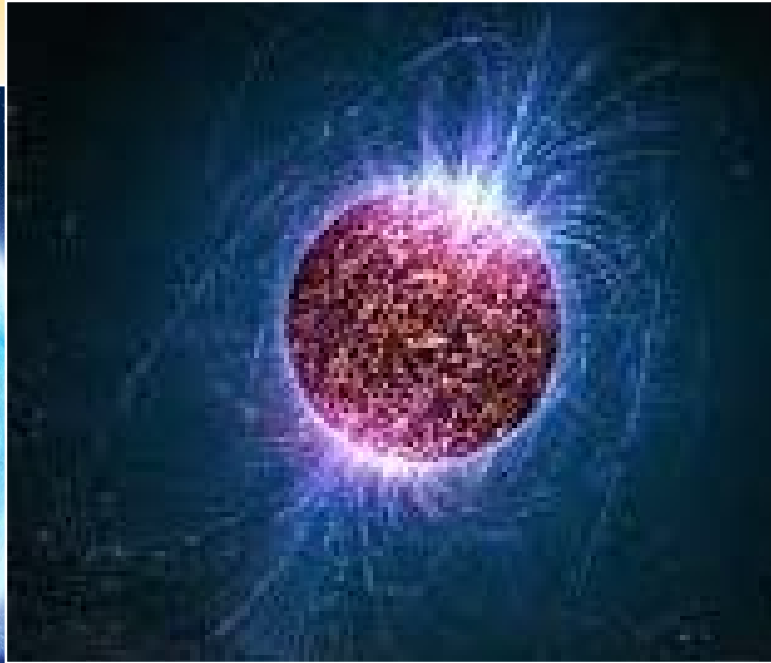

Neutron Star

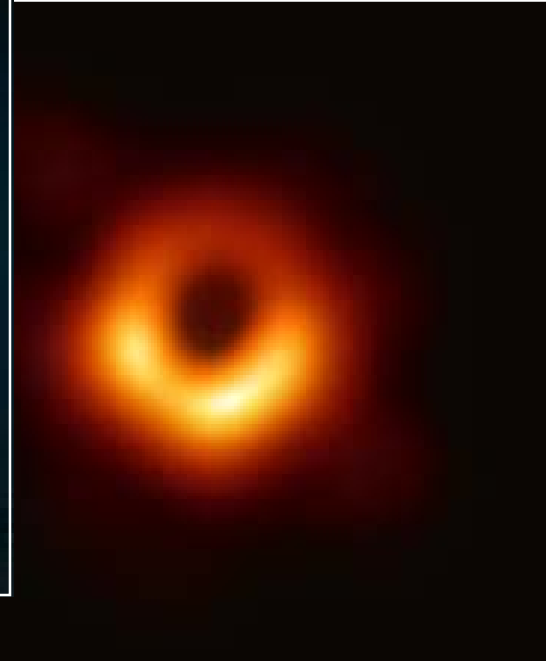

Black Hole

**Collapse of a Star** → **Compact Objects**

# Classification

Stars are classified by:

- size
- mass
- luminosity
- colour

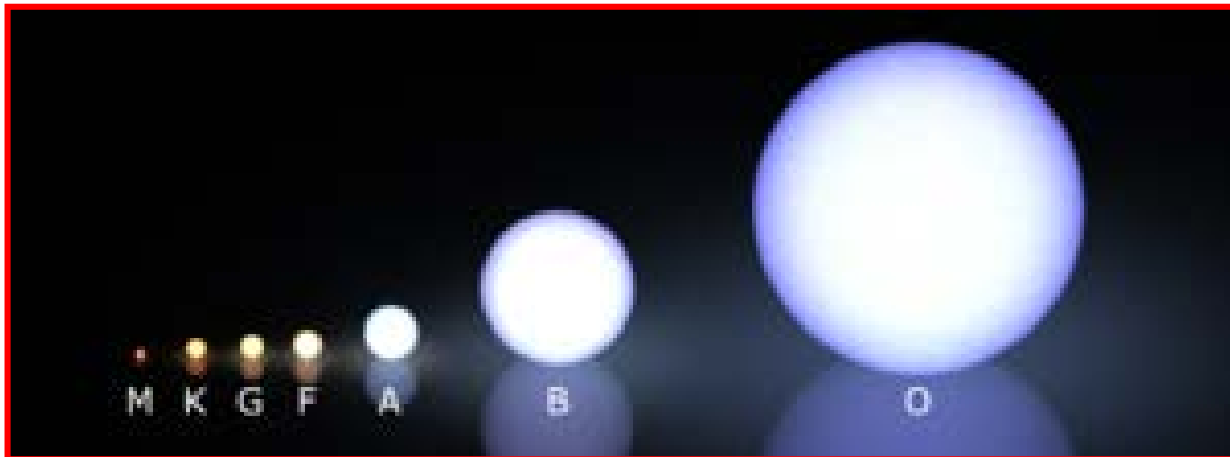

# Neutron Star

If the collapsing stellar core at the center of a supernova contains between **1.5 and 3 solar masses**, the collapse continues until **electrons and protons combine to form neutrons**, producing a neutron star.

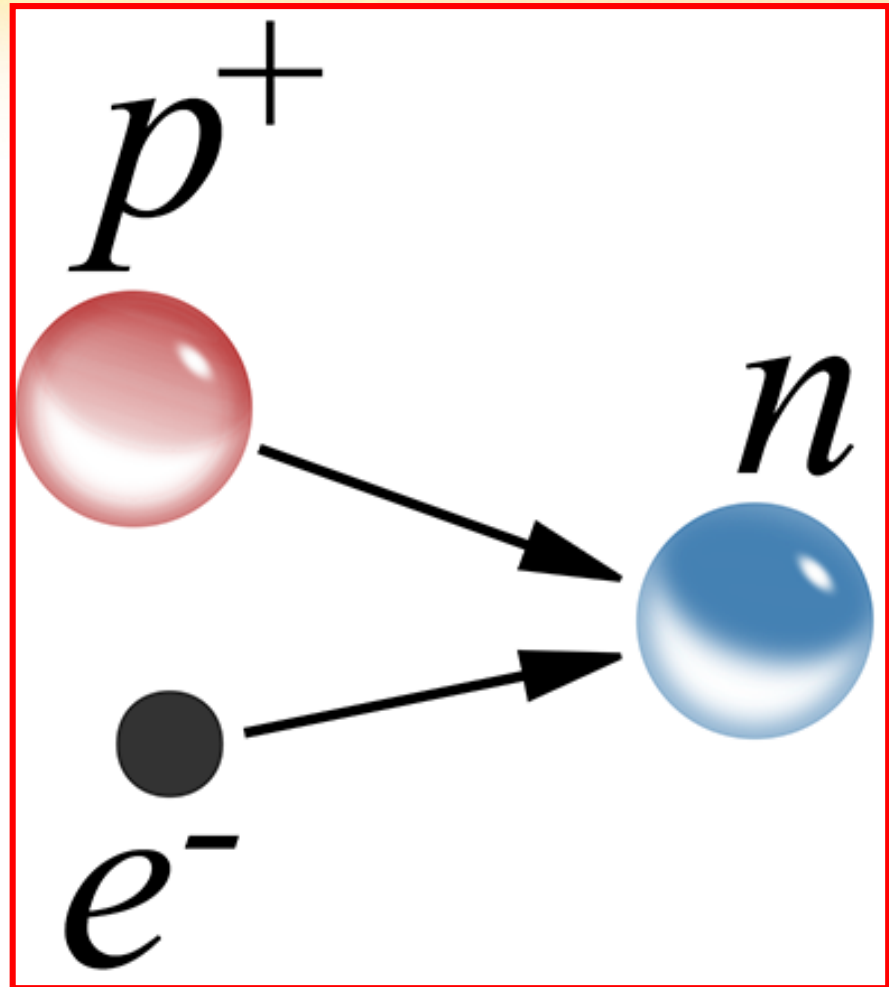

- Gravitational pull is balanced by **neutron degeneracy pressure**.
- Most dense object after the black hole.
- A **cubic meter** of a neutron star would weigh around **400 billion tonnes**.

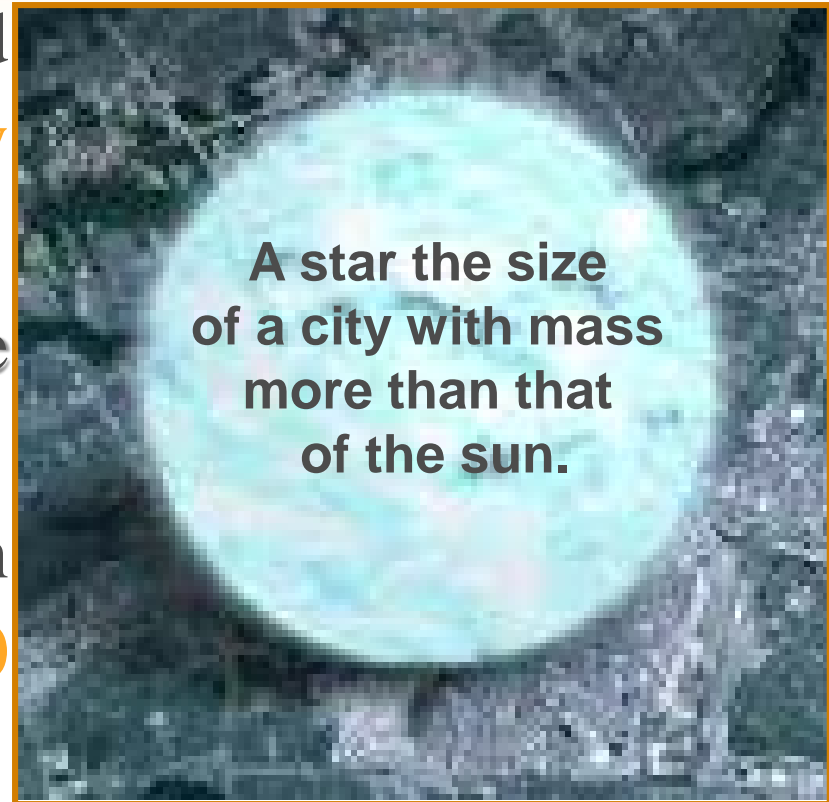



# Link to Early Universe

The detection of **strontium** in **GW170817** merger suggests the presence of **heavier elements** within neutron stars. Thus, **cores of neutron or quark stars are like fossils** which allow us to peek back in time to the beginning of everything.



# Quark Matter

The environment in the **core of neutron stars** is so extreme that rules of nuclear physics may change leading to the formation of **quark matter**.

# Structure of Matter

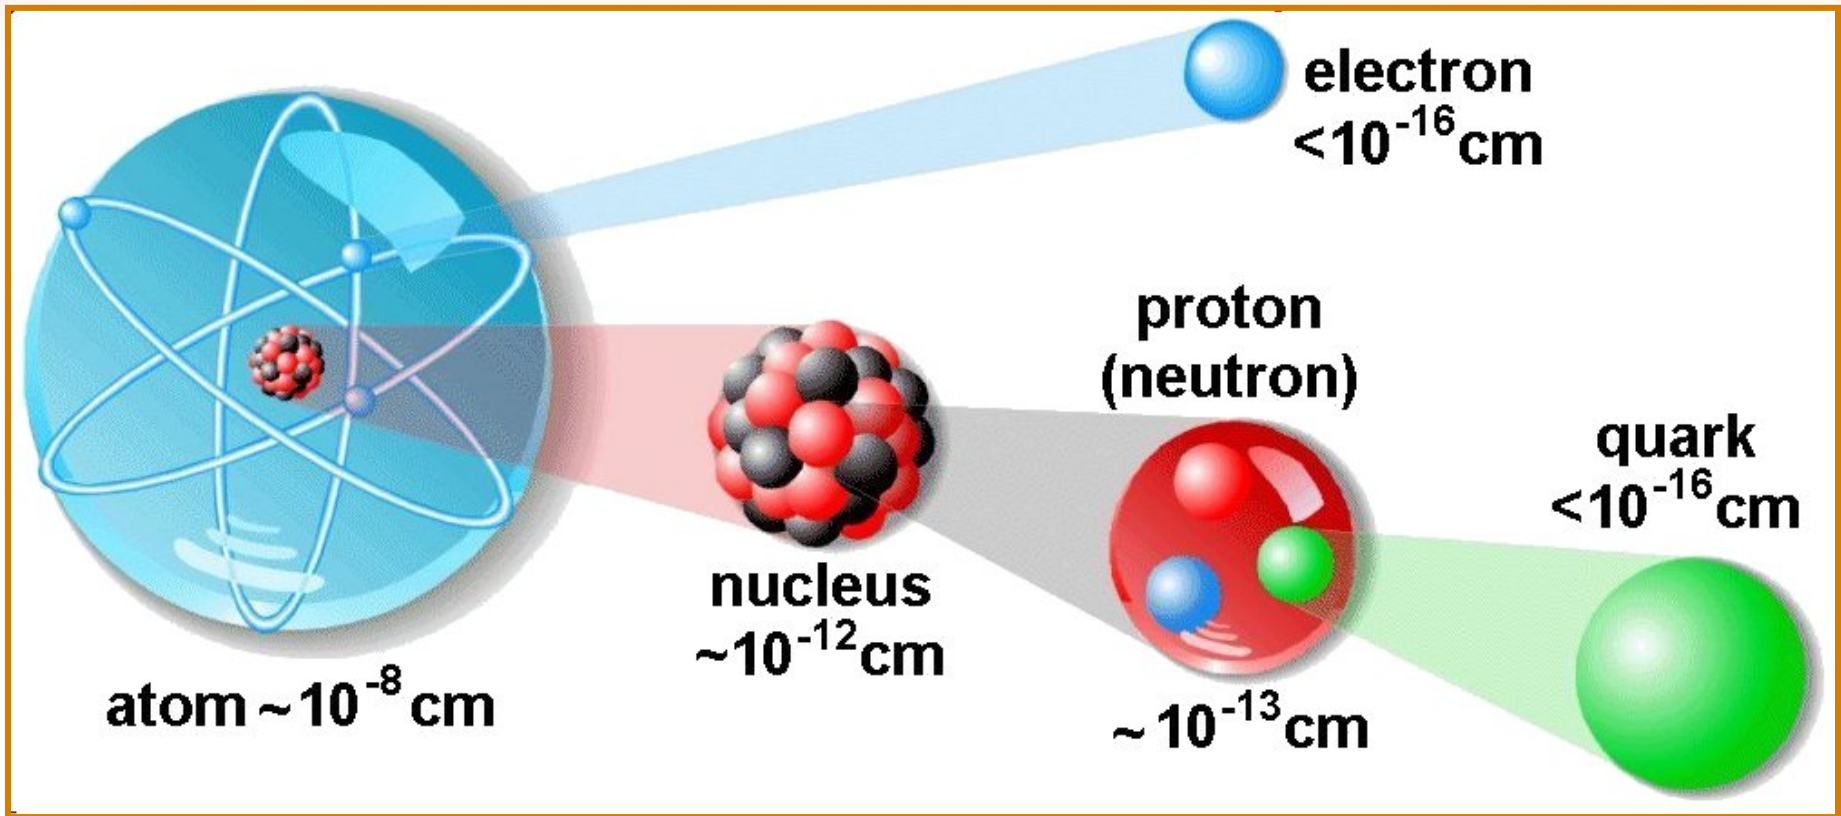

# Quarks

- **Building blocks** of other particles.
- Confined particles **never found in isolation**.
- The energy spent to separate quarks gives rise to new quarks.

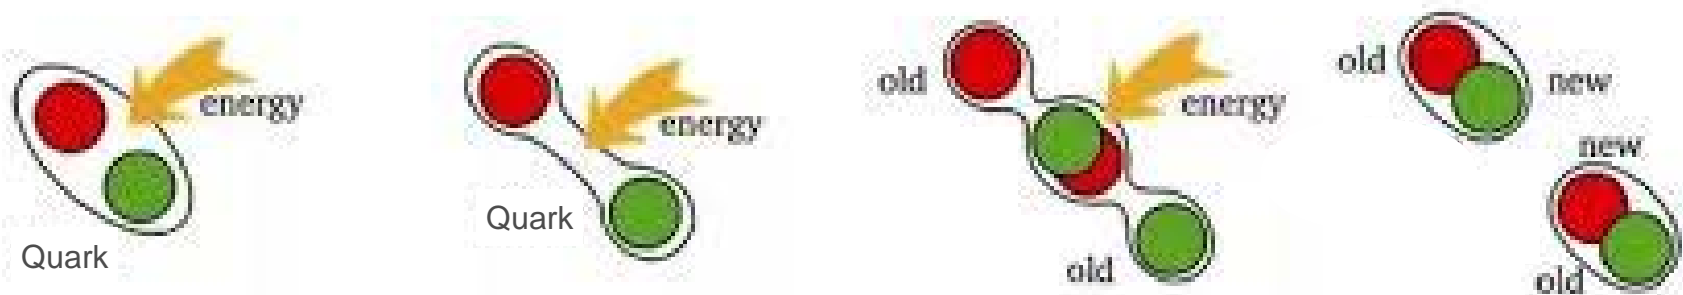

Figure: Inseparability of quarks in spite of spending more energy.



- 
- There are six types of quarks known as **up**, **down**, **strange**, **charm**, **top** and **bottom**.
  - **Up** and **down** quarks have the lowest masses of all quarks and are generally **stable**.
  - **Strange**, **charm**, **bottom** and **top** quarks can only be produced in **high energy collisions**.

# Quark Star

- A hypothetical compact star.
- Protons and neutrons **deconfine** in the core of a neutron star due to **high temperature** and **extreme pressure** leading to a **bath of quarks**.
- Density is much **higher** than a **neutron star**.
- Masses of quark stars lie between **3 to 5 solar masses**.



# Properties of Compact Objects



# Energy-Momentum Tensor

- Perfect fluid

$$T_{\gamma\delta} = (\rho + p)u_{\gamma}u_{\delta} + pg_{\gamma\delta}.$$

- Anisotropic fluid

$$T_{\gamma\delta} = (\rho + p_{\perp})u_{\gamma}u_{\delta} - p_{\perp}g_{\gamma\delta} + (p_r - p_{\perp})u_{\gamma}u_{\delta}.$$

# Equation of State

- The relation between **state determinants** (density, pressure, etc.).
- Characterizes the **state of matter** under a given set of physical conditions.

# MIT Bag Model

The equation of state is given as

$$p_r = \frac{1}{3} (\rho - 4\mathfrak{B}).$$

Different values of the bag constant represent different scenarios.



# The Bag Constant

- The range of  $\mathcal{B}$  for massless strange quarks is  $58.9-91.5 \text{ MeV}/\text{fm}^3$  [Farhi, E. and Jaffe, R.L.: Phys. Rev. D **30**(1984)2379].
- For massive quarks,  $\mathcal{B}$  lies within the range  $56-78 \text{ MeV}/\text{fm}^3$  [Stergioulas, N.: Living Rev. Relativ. **6**(2003)3].

- However, larger values have also been suggested for the bag constant. Xu et al. [*Chin. J. Astron. Astrophys.* **3**(2003)33.] proposed that for an MIT bag model with  $\mathcal{B} = 60 \text{ MeV}/\text{fm}^3$ ,  $110 \text{ MeV}/\text{fm}^3$ , the star **LMXB EXO 0748-676** can be treated as a candidate for strange star.
- Experimental data of **CERN-SPS** and **RHIC** also allows a **wider range** of values for the bag constant [*Rahaman, F. et al.: Eur. Phys. J. C* **72**(2012)2071; *Kalam, M. et al.: Int. J. Theor. Phys.* **52**(2013)3319].

# Gravitational Redshift

If the **energy** of the photon decreases, the **frequency** also decreases. This corresponds to an **increase in the wavelength** of the photon, or a shift to the red end of the electromagnetic spectrum – hence the name: **gravitational redshift**.

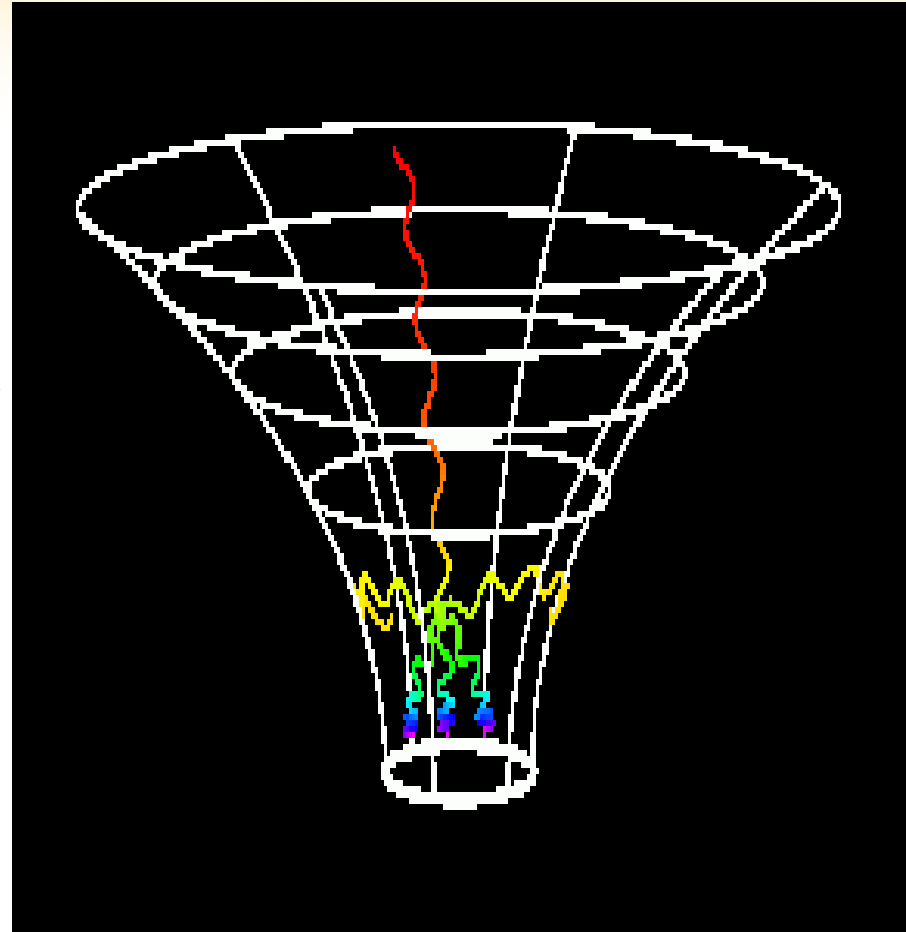





The gravitational redshift of a dense compact object is calculated as

$$Z = \frac{1}{\sqrt{1 - 2u(r)}} - 1,$$

where  $u(r) = \frac{m}{r}$  is the compactness factor.



Buchdahl [Phys. Rev. D **116**(1959)1027.] calculated the upper limit of mass to radius ratio as

$$\frac{m}{r} < \frac{4}{9},$$

which implies that the upper limit of gravitational redshift is [Ivanov, B.V.: Phys. Rev. D **65**(2002)104011.]

$$Z < 5.211.$$

# Equilibrium

A condition of a system when neither its **state of motion** nor its **internal energy** changes under the action of external forces.

# Stellar Equilibrium

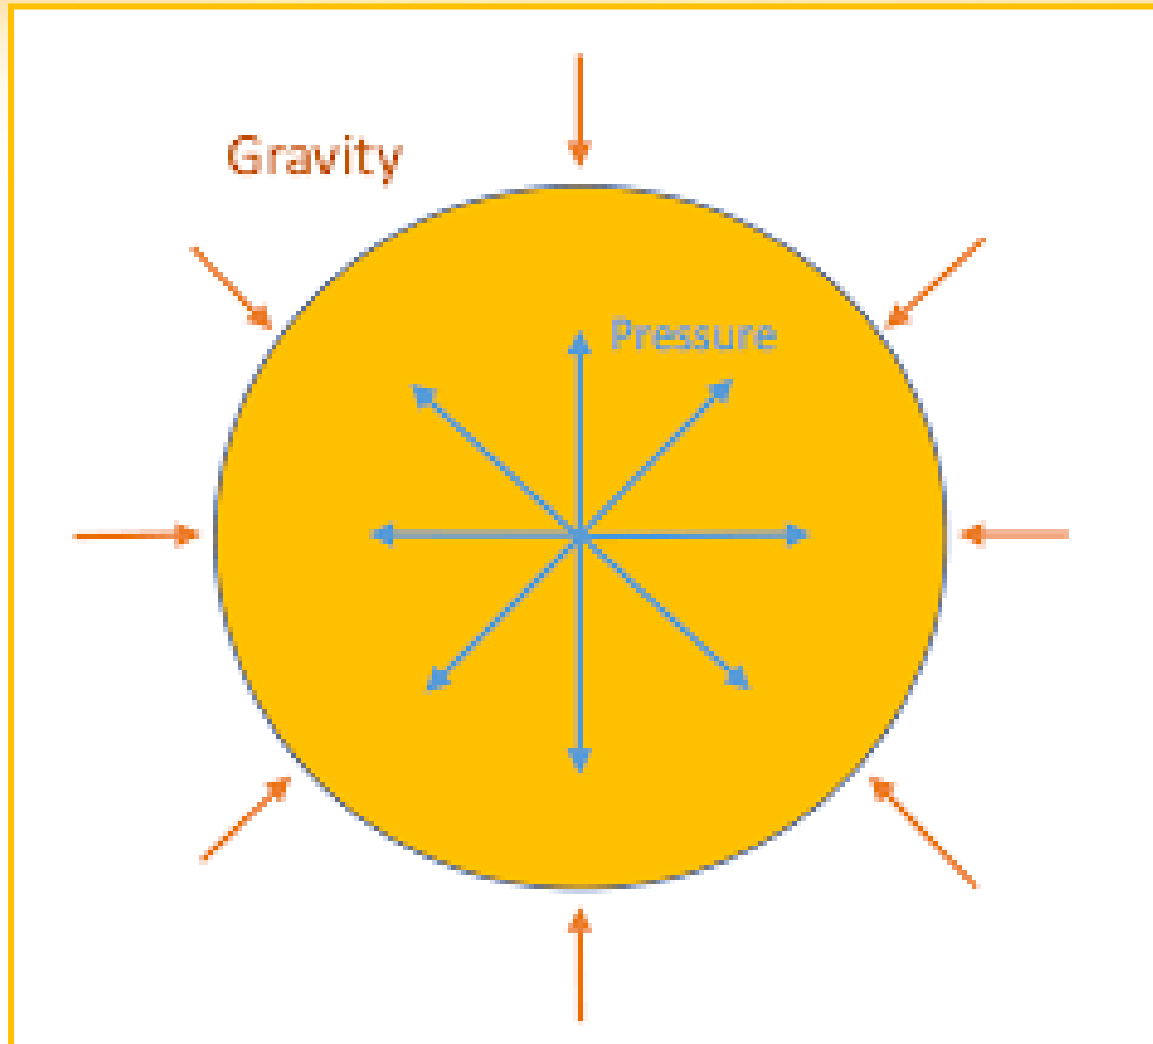



# Stability

In a stable system, a small disturbance will fade away, i.e., the system will stay in, or return to, the equilibrium position.

# Checking Stability

- Causality Condition
- Herrera's Cracking Approach
- Adiabatic Index

# Causality Condition

The speed of sound in a medium depends on how quickly vibrational energy can be transferred through the medium. For a stable structure, the speed of sound must be less than the speed of light.

# Herrera's Cracking Approach

Cracking appears whenever the radial force directed inward in the inner part of the sphere changes its sign beyond some value of the radial coordinate [Herrera, L.: Phys. Lett. A **165**(1992)206].





Based on the concept of cracking and causality condition, Abreu et al. [Class. Quantum Gravit. **24(2007)4631.**] obtained another condition of stability as

$$0 < |v_{\perp}^2 - v_r^2| < 1.$$

# Junction Conditions

The matching of matter to empty space at the boundary of a star must be smooth. For this purpose, the following conditions must be satisfied at the hypersurface ( $\Sigma$ )

$$[ds^2_-]_{\Sigma} = [ds^2_+]_{\Sigma}, \quad [K_{ij-}]_{\Sigma} = [K_{ij+}]_{\Sigma}.$$



# **Self-interacting Brans-Dicke Theory**

# Mach's Principle

The inertial forces observed locally in an accelerated laboratory may be interpreted as gravitational effects having their origin in distant matter accelerated relative to laboratory.



# Theory of General Relativity

$$G_{\gamma\delta} = \mathfrak{R}_{\gamma\delta} - \frac{1}{2}\mathfrak{R}g_{\gamma\delta} + \Lambda g_{\gamma\delta} = \frac{8\pi G}{c^4}T_{\gamma\delta}.$$

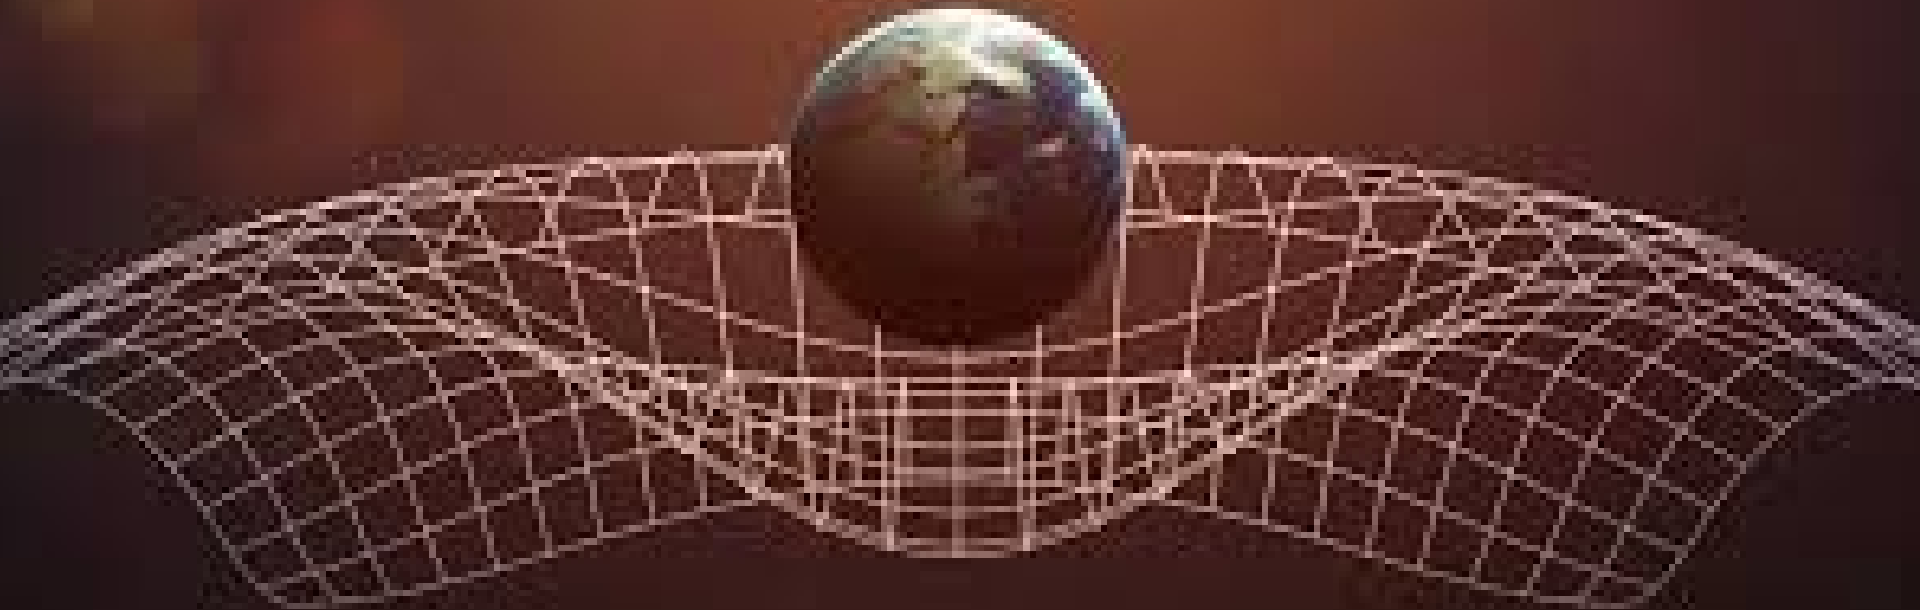

# Dirac's Large Numbers Hypothesis

Relationship between ratios of **size scales** in the universe to that of **force scales** which yield very large dimensionless numbers.



Relation between inertial forces and the overall mass distribution holds if

$$\frac{GM}{R} \approx 1.$$

# The Expanding Universe

In 1929, Edwin Hubble discovered that the farther a galaxy is the faster it recedes from us.

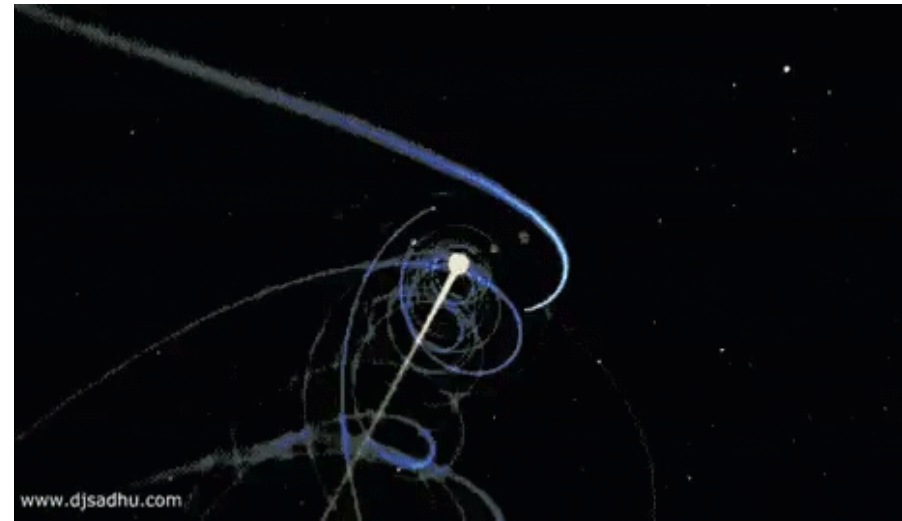



$M$  → Mass of the **visible** universe.

$R$  → Radius of the **observable** universe.

Hence,  $G$  is not a constant but varies from time to time.

# Brans-Dicke Theory

In 1961, Brans and Dicke introduced a scalar-tensor theory by representing the reciprocal of varying gravitational constant through a scalar field  $\Phi$ . The scalar field is coupled to matter as well as gravity through a **coupling parameter** ( $\omega_{BD}$ ).

# Self-interacting Brans-Dicke Theory

- Low values of **coupling parameter** are used to describe cosmic inflation [Weinberg, E.J.: Phys. Rev. D **40**(1989)3950].
- For weak field situations, the value of **coupling parameter** must be greater than **40,000** [Will C.M.: Living Rev. Rel. **4**(2001)4.] and deviations from general relativity are insignificant.

# Self-interacting Brans-Dicke Theory

The action of self-interacting Brans-Dicke (SBD) theory is

$$S = \int \sqrt{-g} \left( \mathcal{R}_\zeta - \frac{\omega_{BD}}{\zeta} \partial_\gamma \zeta \partial_\delta \zeta - V(\zeta) + L_m \right) d^4x.$$



Field Equations:

$$G_{\gamma\delta} = T_{\gamma\delta}^{(\text{eff})} = \frac{1}{\zeta} (T_{\gamma\delta}^{(m)} + T_{\gamma\delta}^{\zeta}),$$

Wave Equation:

$$\square\zeta = \frac{T^{(m)}}{3+2\omega_{BD}} + \frac{1}{3+2\omega_{BD}} \left( \zeta \frac{dV(\zeta)}{d\zeta} - 2V(\zeta) \right),$$

where

$$T_{\gamma\delta}^{\zeta} = \zeta_{,\gamma;\delta} - g_{\gamma\delta} \square\zeta + \frac{\omega_{BD}}{\zeta} \left( \zeta_{,\gamma}\zeta_{,\delta} - \frac{g_{\gamma\delta}\zeta_{\alpha}\zeta^{\alpha}}{2} \right) - \frac{V(\zeta)}{2} g_{\gamma\delta}.$$



# Gravitational Decoupling Scheme

# Gravitational Decoupling

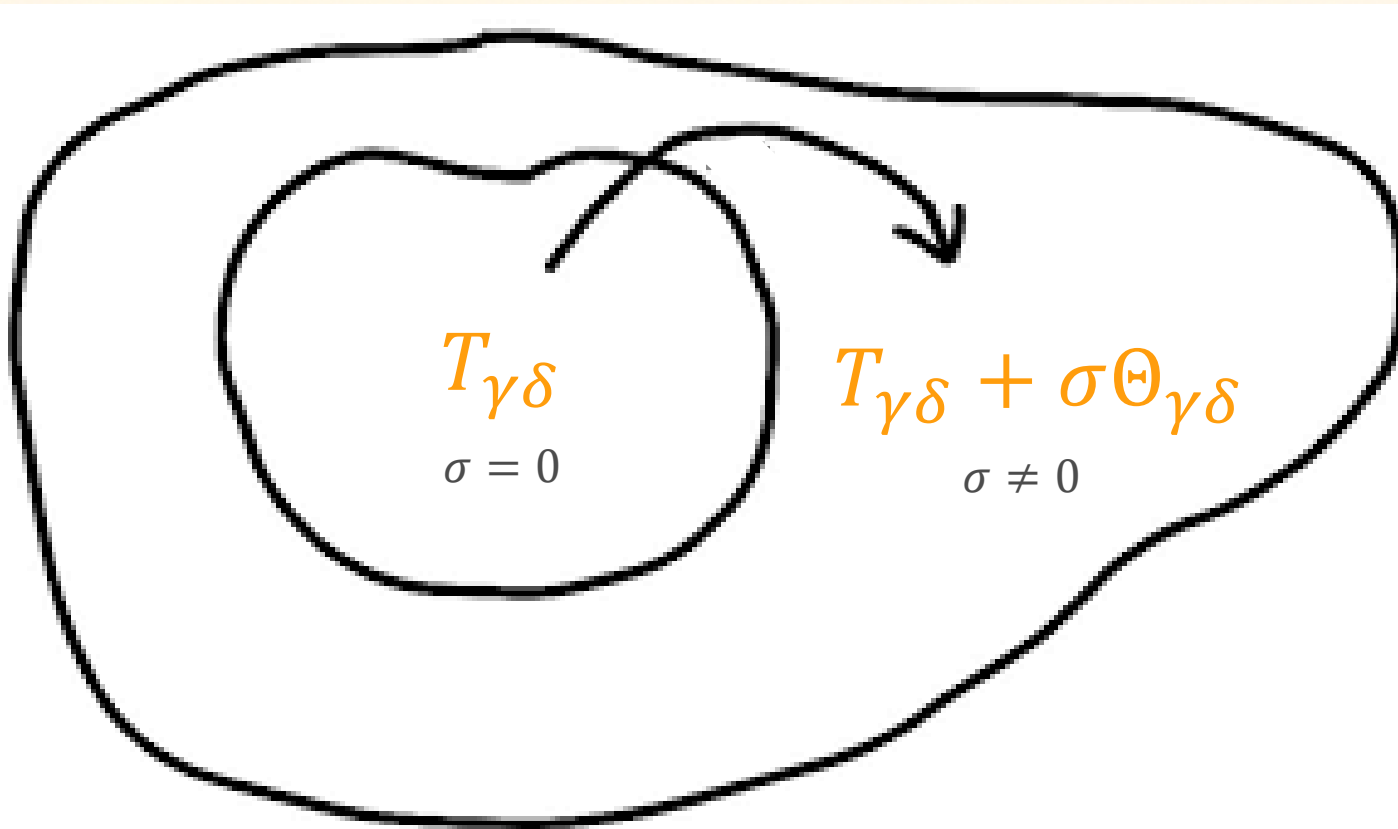

# Scheme

Add a new gravitational source in the original energy-momentum tensor.

Deform the radial metric potential to decouple the field equations into two sets.

- The first set corresponds to the original source.
- The second set relates to the new source.

Assume a known solution for the first set.  
Find a solution of the second set.

Combine solutions of both sets to obtain a new solution.



# Minimal Geometric Deformation

- It only deforms the **radial metric potential** by leaving temporal component unchanged.
- It works as long as the **interaction** between the matter sources is purely **gravitational**.

# Physical Acceptability Conditions

- The **metric co-efficients** must be positive and monotonically increasing.
- The physical parameters ( $\rho$ ,  $p_r$ ,  $p_{\perp}$ ) must be maximum at the center and monotonically decreasing towards the boundary.
- Radial pressure must be **zero at the boundary**.

- The anisotropy ( $\Delta = p_{\perp} - p_r$ ) must be zero at the center.
- Following energy conditions must be satisfied.
  - Weak Energy Condition:  $\rho + p_r \geq 0, \rho + p_{\perp} \geq 0$ .
  - Null Energy Condition:  $\rho \geq 0, \rho + p_r \geq 0, \rho + p_{\perp} \geq 0$ .
  - Strong Energy Condition:  $\rho + p_r \geq 0, \rho + p_r + 2p_{\perp} \geq 0$ .
  - Dominant Energy Condition:  $\rho - p_r \geq 0, \rho + p_{\perp} \geq 0$ .



# **Decoupled Solutions in Self-interacting Brans-Dicke Theory**



# Spherical Spacetime

The line element describing a static sphere is given by

$$ds^2 = e^{\phi(r)} dt^2 - e^{\psi(r)} dr^2 - r^2 d\theta^2 - r^2 \sin^2 \theta d\varphi^2.$$

The matter distribution describing the internal configuration of the spherical structure is

$$T_{\gamma\delta}^{(\text{eff})} = \frac{1}{\zeta} (T_{\gamma\delta}^{(m)} + \sigma \Theta_{\gamma\delta} + T_{\gamma\delta}^{\zeta}).$$

The field equations are obtained as

$$\frac{1}{r^2} - e^{-\psi} \left( \frac{1}{r^2} - \frac{\psi'}{r} \right) = \frac{1}{\varsigma} (\rho + \sigma \Theta_0^0 + T_0^{0\varsigma}),$$

$$-\frac{1}{r^2} + e^{-\psi} \left( \frac{1}{r^2} + \frac{\phi'}{r} \right) = \frac{1}{\varsigma} (p - \sigma \Theta_1^1 - T_1^{1\varsigma}),$$

$$\frac{e^{-\psi}}{4} \left( 2\phi'' + \phi'^2 - \psi'\phi' + 2\frac{\phi' - \psi'}{r} \right) = \frac{1}{\varsigma} (p - \sigma \Theta_2^2 - T_2^{2\varsigma}),$$

where

$$T_0^{0\zeta} = e^{-\psi} \left[ \zeta'' + \left( \frac{2}{r} - \frac{\psi'}{2} \right) \zeta' + \frac{\omega_{BD}}{2\zeta} \zeta'^2 - e^\psi \frac{V(\zeta)}{2} \right],$$

$$T_1^{1\zeta} = e^{-\psi} \left[ \left( \frac{2}{r} + \frac{\phi'}{2} \right) \zeta' - \frac{\omega_{BD}}{2\zeta} \zeta'^2 - e^\psi \frac{V(\zeta)}{2} \right],$$

$$T_2^{2\zeta} = e^{-\psi} \left[ \zeta'' + \left( \frac{1}{r} - \frac{\psi'}{2} + \frac{\phi'}{2} \right) \zeta' + \frac{\omega_{BD}}{2\zeta} \zeta'^2 - e^\psi \frac{V(\zeta)}{2} \right].$$

The wave equation reads

$$\begin{aligned}\square_{\zeta} &= -e^{-\psi} \left[ \left( \frac{2}{r} - \frac{\psi'}{2} + \frac{\phi'}{2} \right) \zeta' + \zeta'' \right] \\ &= \frac{1}{3 + 2\omega_{BD}} \left[ T^{(m)} + \Theta + \left( \zeta \frac{dV(\zeta)}{d\zeta} - 2V(\zeta) \right) \right].\end{aligned}$$

The potential function is chosen as

$$V(\zeta) = \frac{1}{2} m_{\zeta}^2 \zeta^2.$$



# Transformations

Apply the MGD technique through the transformation

$$e^{-\psi(r)} \mapsto \lambda(r) + \sigma\nu(r),$$

where  $\nu(r)$  is the deformation function that governs the translation in the radial metric component. The temporal metric potential remains unchanged.

# Decoupling

The first set corresponds to  $\sigma = 0$  and exclusively describes the isotropic configuration as

$$\begin{aligned}\rho &= -\frac{1}{2r^2\zeta(r)}[r^2\omega\lambda(r)\zeta'^2(r) - r^2\zeta(r)V(\zeta) + r\zeta(r)(r\lambda'(r)\zeta'(r) + 2r\lambda(r)\zeta''(r) \\ &+ 4\lambda(r)\zeta'(r)) + 2\zeta^2(r)(r\lambda'(r) + \lambda(r) - 1)], \\ p &= \frac{1}{r^2}[\zeta(r)(r\lambda(r)\phi'(r) + \lambda(r) - 1)] + \frac{1}{2r\zeta(r)}[\lambda(r)\zeta'(r)(\zeta(r)(r\phi'(r) + 4) \\ &- r\omega_{BDS}\zeta'(r))] - \frac{V(\zeta)}{2}, \\ p &= \frac{1}{4r\zeta(r)}[\zeta(r)\lambda'(r)(\zeta(r)(r\phi'(r) + 2) + 2r\zeta'(r)) + \lambda(r)(2\zeta(r)\zeta'(r) \\ &\times ((r\phi'(r) + 2) + 2r\zeta''(r)) + \zeta^2(r)(2r\phi''(r) + r\phi'^2(r) + 2\phi'(r)) \\ &+ 2r\omega_{BDS}\zeta'^2(r)) - 2r\zeta(r)V(\zeta)].\end{aligned}$$

The second set containing evolution equations for the anisotropic source is given as

$$\begin{aligned}
 \Theta_0^0 &= \frac{-1}{2r^2\zeta(r)} [r\zeta(r)\nu'(r)(r\zeta'(r) + 2\zeta(r)) + \nu(r)(r^2\omega_{BD}\zeta'^2(r) + 2r\zeta(r) \\
 &\times (r\zeta''(r) + 2\zeta'(r)) + 2\zeta^2(r))], \\
 \Theta_1^1 &= \frac{-1}{2r^2\zeta(r)} [\nu(r)(-r^2\omega_{BD}\zeta'(r)^2 + r\zeta(r)(r\phi'(r) + 4)\zeta'(r) + 2\zeta^2(r) \\
 &\times (r\phi'(r) + 1))], \\
 \Theta_2^2 &= \frac{-1}{4\zeta(r)} [2\zeta(r)(r\nu'(r)\zeta'(r) + \nu(r)((r\phi'(r) + 2)\zeta'(r) + 2r\zeta''(r))) \\
 &+ \zeta^2(r)(\nu'(r)(r\phi'(r) + 2) + \nu(r)(2r\phi''(r) + r\phi'^2(r) + 2\phi'(r))) \\
 &+ 2r\omega_{BD}\nu(r)\zeta'^2(r)].
 \end{aligned}$$

# Conservation of Mass and Energy

The conservation of isotropic matter distribution is represented by the equation

$$T_1^{1'(\text{eff})} - \frac{\phi'(r)}{2} (T_0^{0(\text{eff})} - T_1^{1(\text{eff})}) = 0.$$

Whereas the divergence of the additional source leads to

$$\Theta_1^{1'(\text{eff})} - \frac{\phi'(r)}{2} (\Theta_0^{0(\text{eff})} - \Theta_1^{1(\text{eff})}) - \frac{2}{r} (\Theta_2^{2(\text{eff})} - \Theta_1^{1(\text{eff})}) = 0,$$



$$\begin{aligned}
\Theta_0^{0(\text{eff})} &= \frac{1}{\varsigma} \left( \Theta_0^0 + \frac{1}{2} \nu'(r) \varsigma'(r) + \nu(r) \varsigma''(r) + \frac{\omega_{BD} \nu(r) \varsigma'^2(r)}{2\varsigma(r)} + \frac{2\nu(r) \varsigma'(r)}{r} \right), \\
\Theta_1^{1(\text{eff})} &= \frac{1}{\varsigma} \left( \Theta_1^1 + \frac{1}{2} \nu(r) \phi'(r) \varsigma'(r) - \frac{\omega_{BD} \nu(r) \varsigma'^2(r)}{2\varsigma(r)} + \frac{2\nu(r) \varsigma'(r)}{r} \right), \\
\Theta_2^{2(\text{eff})} &= \frac{1}{\varsigma} \left( \Theta_2^2 + \frac{1}{2} \nu'(r) \varsigma'(r) + \frac{1}{2} \nu(r) \phi'(r) \varsigma'(r) + \nu(r) \varsigma''(r) \right. \\
&\quad \left. + \frac{\omega_{BD} \nu(r) \varsigma'^2(r)}{2\varsigma(r)} + \frac{\nu(r) \varsigma'(r)}{r} \right).
\end{aligned}$$

# Isotropic Solutions

We extend Tolman V solution [Phys. Rev. **55**(1939)364.]

to anisotropic domain. Tolman V spacetime is defined as

$$ds^2 = B^2 r^{2n} dt^2 - \left( \frac{1 + 2n - n^2}{1 - (1 + 2n - n^2) \left(\frac{r}{F}\right)^W} \right) dr^2 - r^2 d\theta^2 - r^2 \sin^2 \theta d\varphi^2,$$

where  $n$ ,  $F$  and  $B$  are unknown constants with  $W$   
 $= \frac{2(1+2n-n^2)}{1+n}$ .

The energy density and pressure of the anisotropic analogue of Tolman V are expressed as

$$\begin{aligned}
 \rho &= \frac{-1}{2r^2\zeta} \left( r\zeta \left( r\zeta' \left( \sigma\nu'(r) + \frac{\zeta_1}{r} \right) + 2\sigma\nu(r) (r\zeta'' + 2\zeta') + 2\zeta_2 (r\zeta'' \right. \right. \\
 &+ \left. \left. 2\zeta') \right) + 2\zeta^2 (\sigma r\nu'(r) + \sigma\nu(r) + \zeta_1 + \zeta_2 - 1) + r^2\omega_{BD}\zeta'^2 (\sigma\nu(r) \right. \\
 &+ \left. \zeta_2) - r^2\zeta V(\zeta) \right), \\
 p_r &= \frac{\zeta}{r^2} (\nu(r)(\sigma + 2\sigma n) + \zeta_2(2n + 1) - 1) + \frac{\zeta' (2(n + 2)\zeta - r\omega_{BD}\zeta')}{2r\zeta} \\
 &\times (\sigma\nu(r) + \zeta_2) - \frac{V(\zeta)}{2},
 \end{aligned}$$

$$\begin{aligned}
p_{\perp} &= \frac{\zeta}{2r^2} \left( \sigma(n+1)r\nu'(r) + 2\sigma n^2\nu(r) + \frac{1}{\zeta_3^2}((n-2)n-1)(2n-n^2+1) \right. \\
&\times \left. (2n^2 - (n+1)W) \left( \frac{r}{F} \right)^W - 2n^2 \right) + (\sigma\nu(r) + \zeta_2) \left( \frac{\zeta'}{2} \right. \\
&\times \left. \left( \frac{\sigma\nu'(r) + \frac{\zeta_1}{r}}{\sigma\nu(r) + \zeta_2} + \frac{2n}{r} + \frac{2}{r} \right) + \zeta'' + \frac{\omega_{BD}\zeta'^2}{2\zeta} \right) - \frac{V(\zeta)}{2},
\end{aligned}$$

where  $\zeta_1 = \frac{(n^2-2n-1)^2 W \left(\frac{r}{F}\right)^W}{(\zeta_3)^2}$ ,  $\zeta_2 = \frac{-n^2+2n+1}{\zeta_3}$  and  $\zeta_3 = \left( (n^2-2n-1) \left(\frac{r}{F}\right)^W + 1 \right)$ .



The unknown constants are evaluated through matching with Schwarzschild spacetime as

$$\begin{aligned} B &= \frac{\sqrt{M} R^{\frac{R}{4M-2R}}}{\sqrt{-\frac{M}{2M-R}}}, \\ n &= \frac{M}{R-2M}, \\ W &= -\frac{2(M^2 + 2MR - R^2)}{2M^2 - 3MR + R^2}, \\ F &= R \left( \frac{M^2(R-2M)}{R(-M^2 - 2MR + R^2)} \right)^{-\frac{1}{W}}, \end{aligned}$$

$$\omega_{BD} = \frac{2M - R}{8M^2((n - 2)n - 1)} \left( -((n - 2)n - 1)(2M - R) \left(\frac{R}{F}\right)^W (m_\zeta R \right. \\ \times (2M - R) - 4) - 4m_\zeta M^2 R + 4m_\zeta M R^2 - m_\zeta R^3 + 8Mn^3 \\ \left. - 24Mn^2 + 8Mn + 16M - 8n^3 R + 12n^2 R + 16nR) \right).$$

# MIT Bag Model

In order to determine the deformation function, we apply the bag model on the system which yields the following differential equation

$$\begin{aligned} & (\sigma r \nu'(r) \zeta' + \sigma \nu(r) (2(3n + 8) \zeta' + 2r \zeta'')) + 2\zeta_2 r \zeta'' + \zeta_1 \zeta' + 6n \zeta_2 \zeta' \\ & + 16\zeta_2 \zeta' - 4rV(\zeta) + 8r\mathcal{B} + \frac{2\zeta}{r} (\sigma r \nu'(r) + \sigma(6n + 4)\nu(r) + \zeta_1 \\ & + (6n + 4)\zeta_2 - 4) - 2r^2 \omega_{BD} \zeta'^2 (\sigma \nu(r) + \zeta_2) = 0, \end{aligned}$$

which is numerically solved along with the wave equation subject to central conditions ( $\zeta(0) = 0.2$ ,  $\zeta'(0) = 0$  and  $\nu(0) = \nu_c$ ) for three stars: PSR J1614-2230, Her X1 and 4U 1608-52

# Case I: Linear Equation of State

Table 1: Values of different parameters corresponding to stellar candidates for  $m_\zeta = 0.001$  and  $\mathcal{B} = 60 \text{ MeV}/\text{fm}^3$ .

|                        | PSR J1614-2230 | Her X-1 | 4U 1608-52 |
|------------------------|----------------|---------|------------|
| $M (M_\odot)$          | 1.97           | 0.88    | 1.74       |
| $R (km)$               | 13             | 7.7     | 9.3        |
| $\omega_{BD}$          | 9.750          | 15.353  | 6.593      |
| $\nu_c (\sigma = 0.2)$ | -5.1           | -3.6    | -6.8       |
| $\nu_c (\sigma = 0.9)$ | -1.132         | -0.8    | -1.5       |





# **Extended Tolman V Solution**

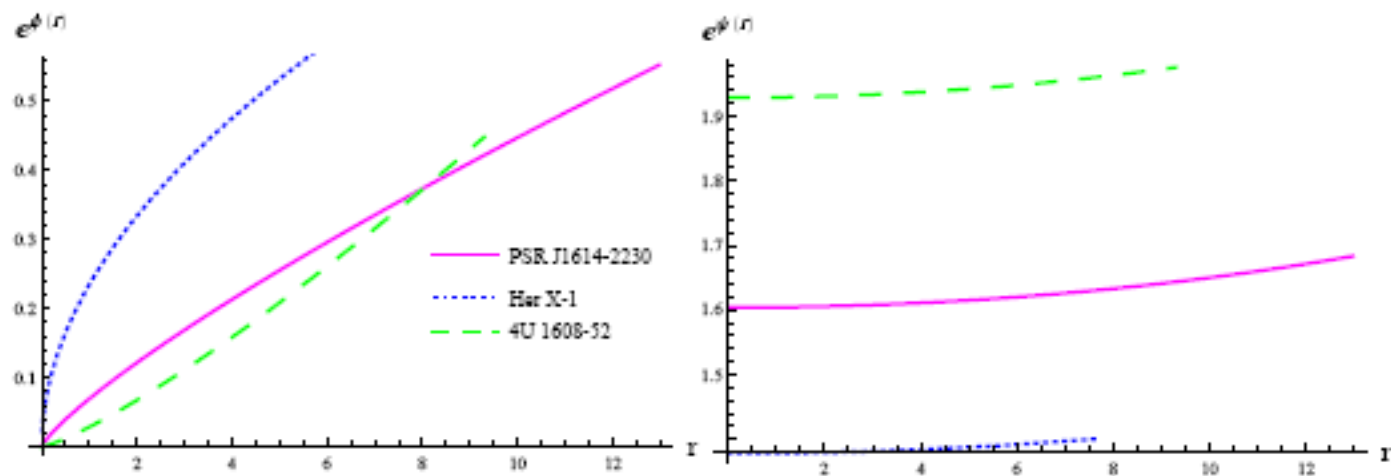

Figure 1: Plots of temporal and radial metric components of anisotropic Tolman V solution for  $\sigma = 0.2$ .

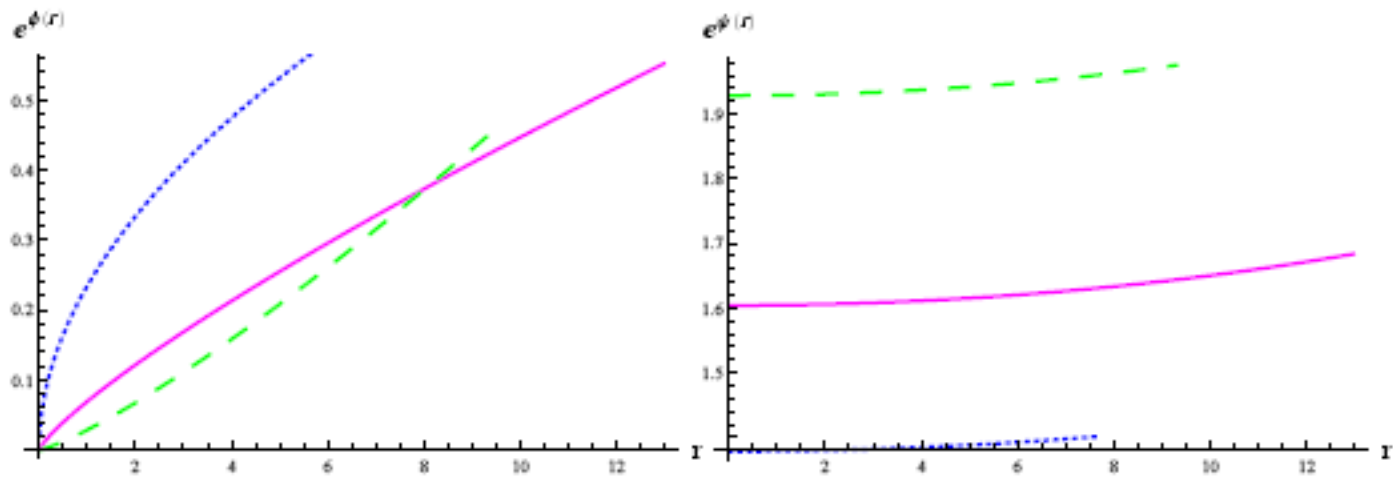

Figure 2: Plots of temporal and radial metric components of anisotropic Tolman V solution for  $\sigma = 0.9$ .

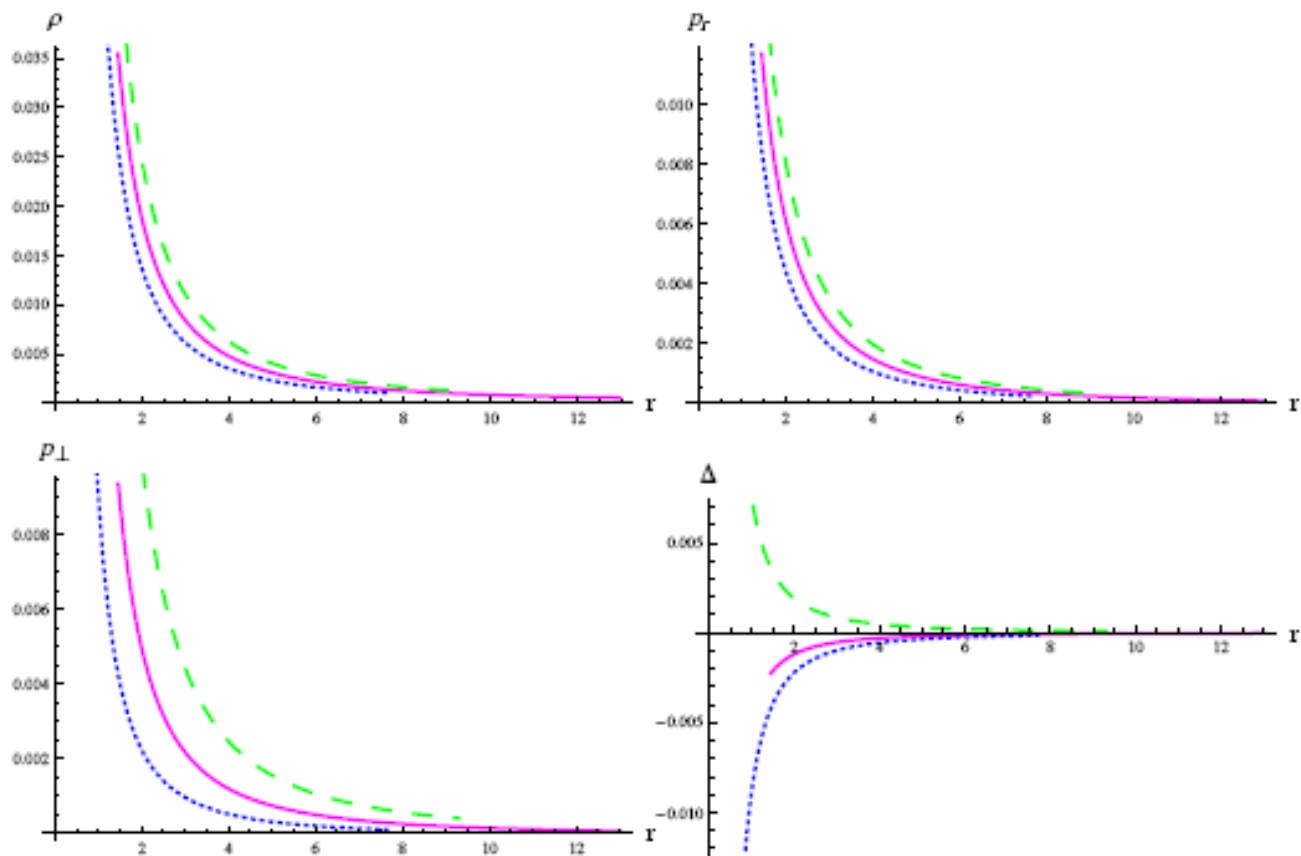

Figure 3: Plots of  $\rho$ ,  $p_r$ ,  $p_{\perp}$  (in  $km^{-2}$ ) and  $\Delta$  of anisotropic Tolman V solution for  $\sigma = 0.2$ .



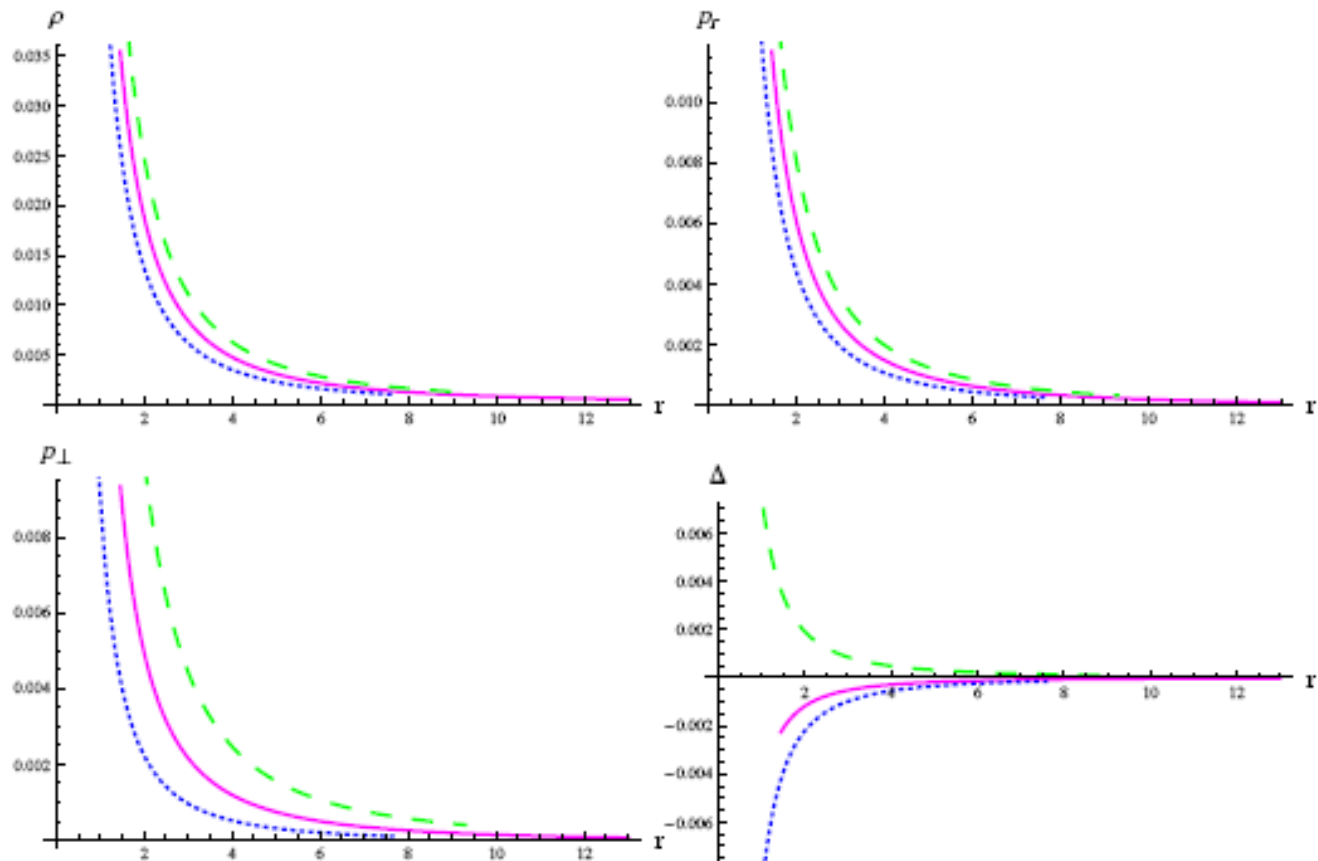

Figure 4: Plots of  $\rho$ ,  $p_r$ ,  $p_{\perp}$  (in  $km^{-2}$ ) and  $\Delta$  of anisotropic Tolman V solution for  $\sigma = 0.9$ .

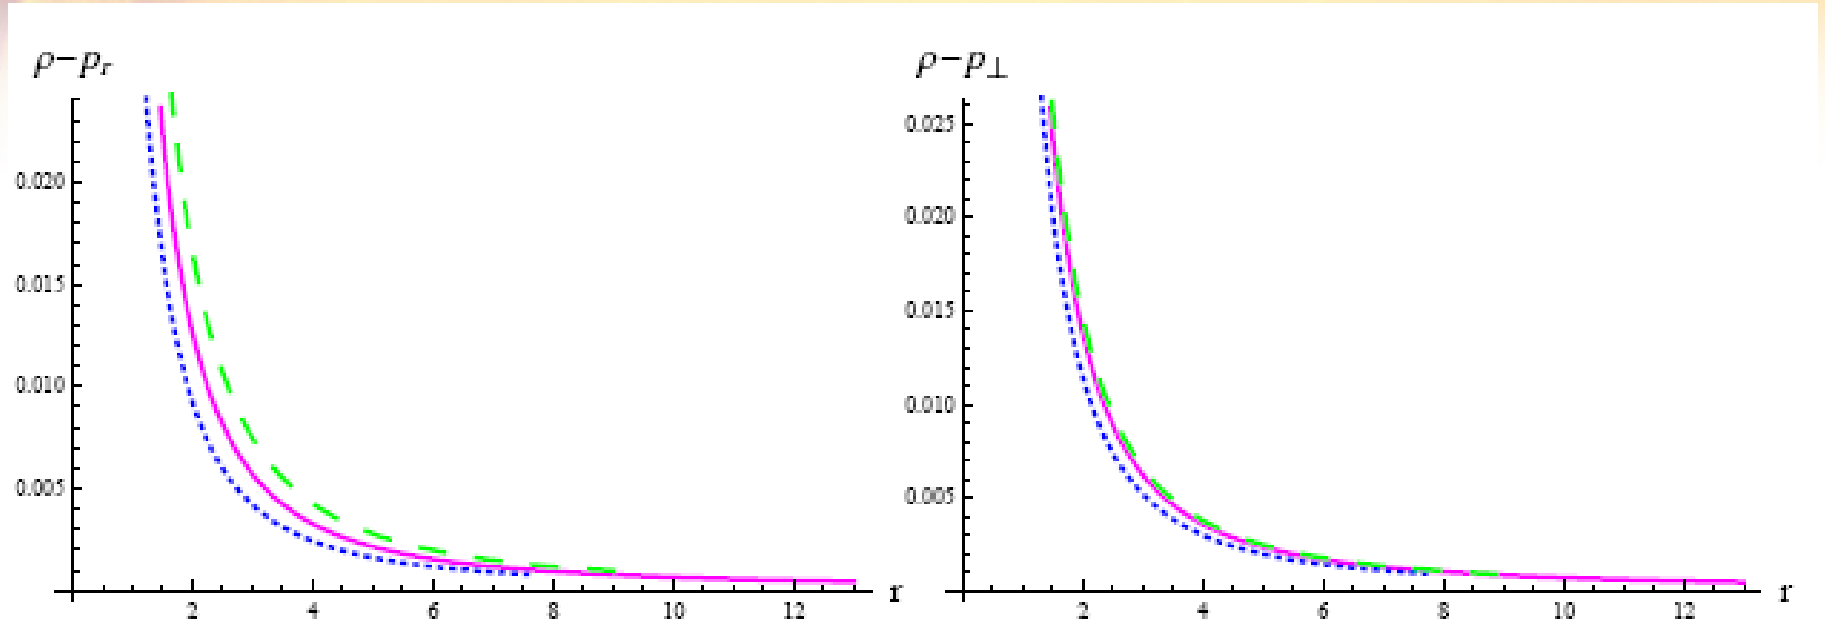

Figure 5: DEC for extended Tolman V solution for  $\sigma = 0.2$ .

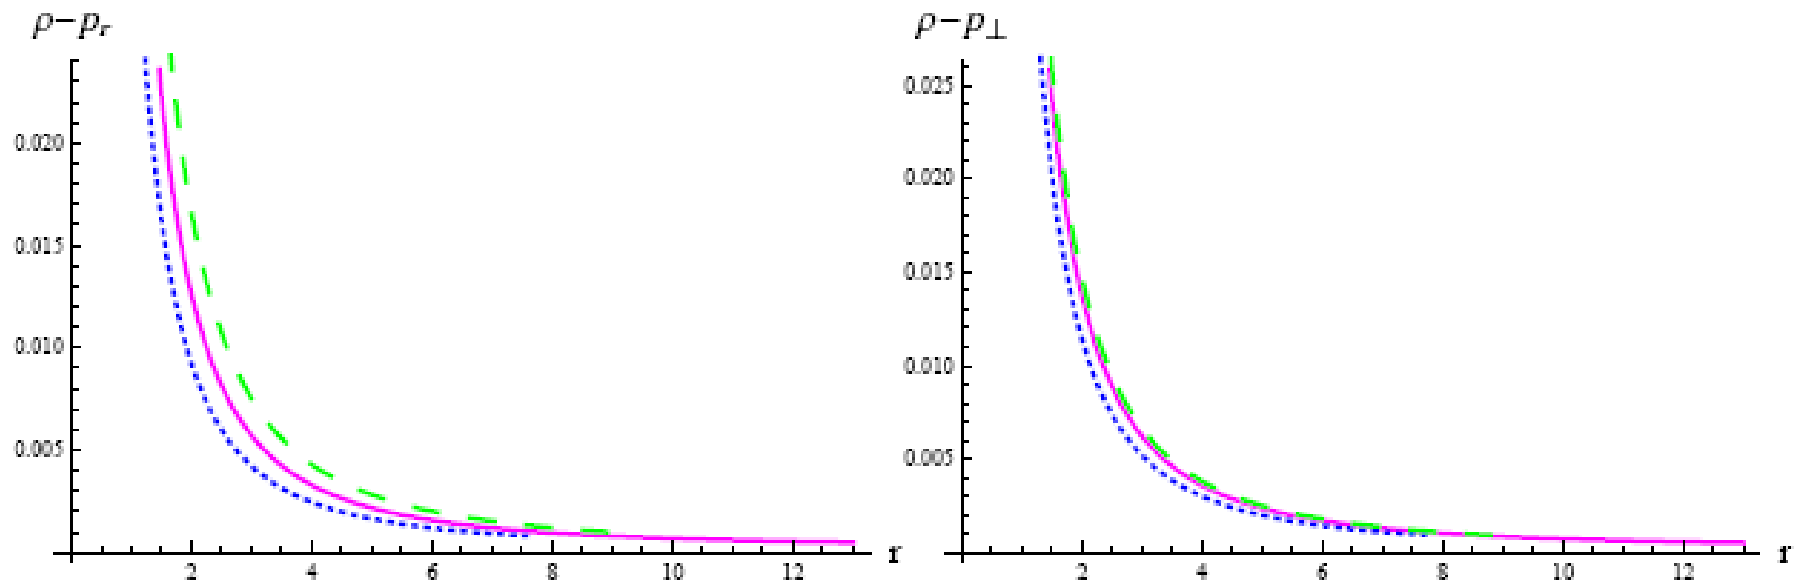

Figure 6: DEC for extended Tolman V solution for  $\sigma = 0.9$ .

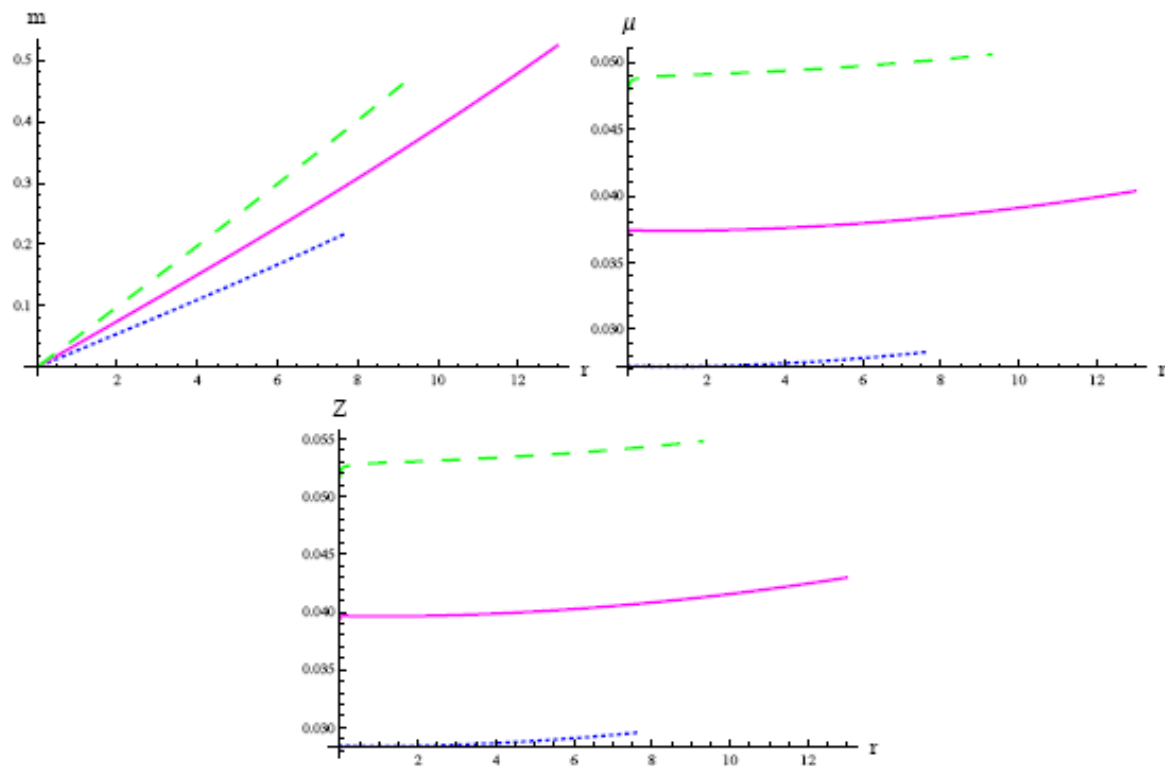

Figure 7: Plots of  $m$ ,  $\mu$  and  $Z$  corresponding to anisotropic Tolman V solution for  $\sigma = 0.2$ .



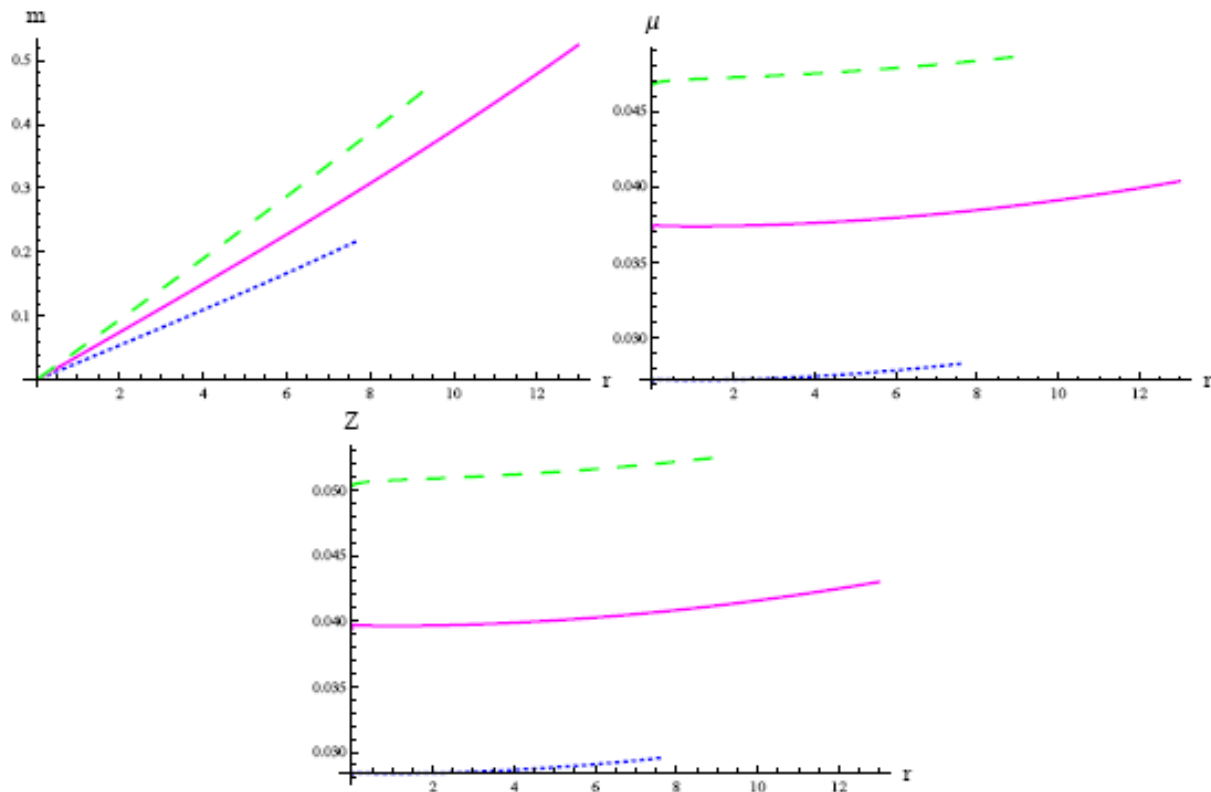

Figure 8: Plots of  $m$ ,  $\mu$  and  $Z$  corresponding to anisotropic Tolman V solution for  $\sigma = 0.9$ .

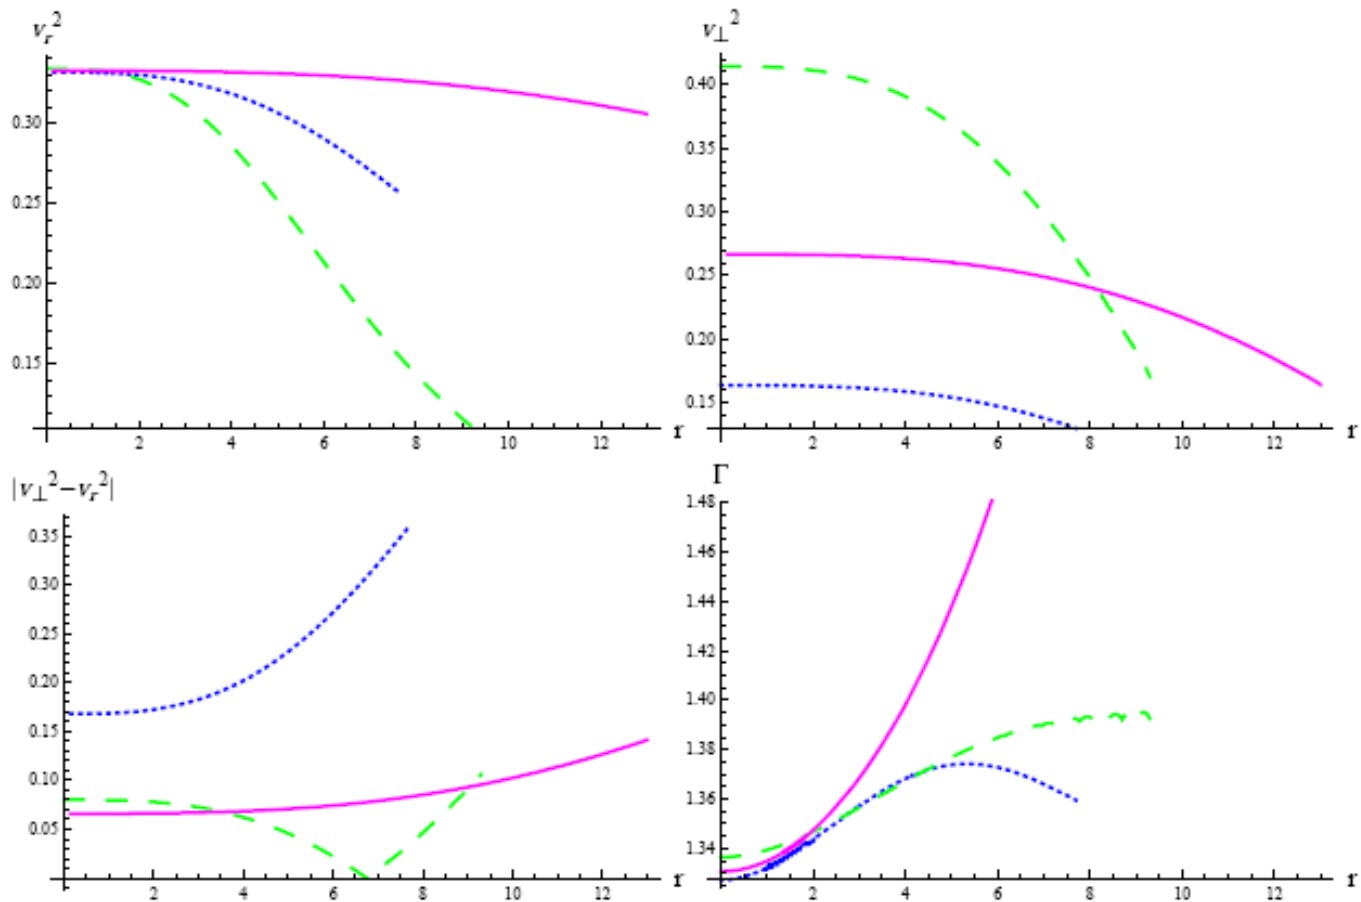

Figure 9: Plots of radial/tangential velocities,  $|v_{\perp}^2 - v_r^2|$  and adiabatic index of extended Tolman V solution for  $\sigma = 0.2$ .

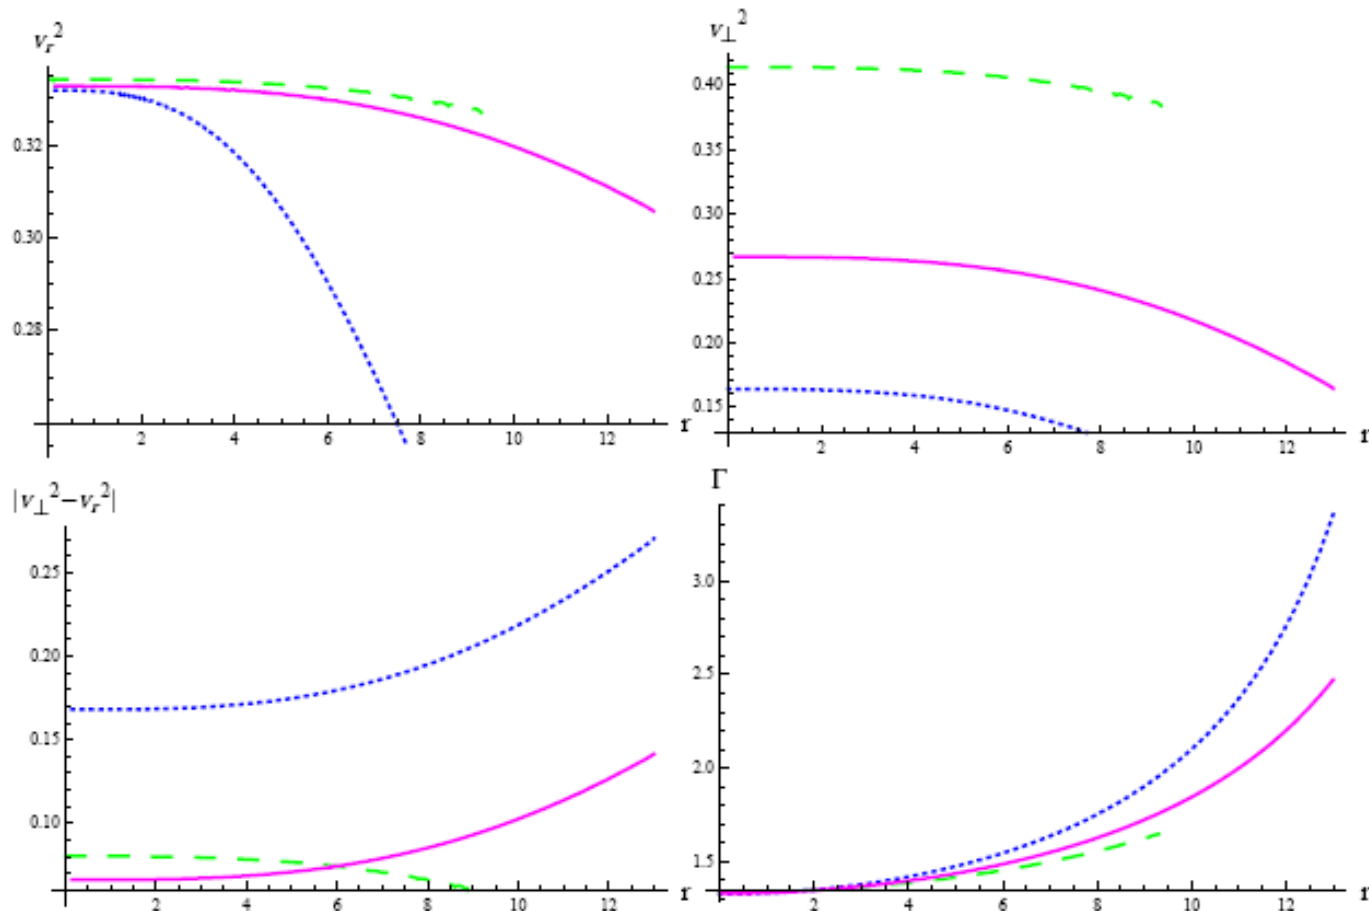

Figure 10: Plots of radial/tangential velocities,  $|v_{\perp}^2 - v_r^2|$  and adiabatic index of extended Tolman V solution for  $\sigma = 0.9$ .



# Concluding Remarks





We have formulated an **anisotropic** model for **strange quark star** through **MGD** technique in **SBD gravity**.

- Anisotropy has been induced in the isotropic matter configuration by means of an **additional source**.
- The two sources (seed and additional) have been decoupled through a **linear transformation of the radial metric component**.
- We have considered **Tolman V spacetime** as a solution for the array corresponding to the **isotropic** source.
- The second system has been solved by imposing **MIT bag model** on state variables.

- We have numerically evaluated the wave equation for  $V(\zeta) = \frac{1}{2}m_\zeta^2 \zeta^2$ ,  $m_\zeta = 0.001$  and  $\sigma = 0.2, 0.9$ .
- The physical behavior of the extended model has been examined for  $\mathfrak{B} = 60 \text{ MeV}/\text{fm}^3$  through energy constraints as well as causality and cracking approaches for the stars Her X-1, PSR J1614-2230 and 4U 1608-52.
- The strange star structure formulated via decoupling is physically realistic and stable in the presence of a massive scalar field.

Thank You
